# Supplementary material for: An atypical and functionally diverse family of Kunitz-type cysteine/serine proteinase inhibitors secreted by the helminth parasite Fasciola hepatica
Source: PubMed Central journal article supplement (PMC7692546; doi:10.1038/s41598-020-77687-7), 2020-11-26

**An atypical and functionally diverse family of Kunitz-type cysteine/serine proteinase inhibitors secreted by the helminth parasite *Fasciola hepatica***

David Smith<sup>1,2</sup>, Krystyna Cwiklinski<sup>1,3</sup>, Heather Jewhurst<sup>1,3</sup>, Irina G. Tikhonova<sup>4</sup>, John P. Dalton<sup>1,3</sup>

Author affiliations:

1. School of Biological Sciences, Queen's University Belfast BT9 7BL, Belfast, Northern Ireland, United Kingdom; 2. Present address: Moredun Research Institute, Pentland Science Park, Penicuik, Midlothian, Scotland, United Kingdom; 3. Centre of One Health and Ryan Institute, School of Natural Sciences, National University of Ireland Galway, Galway, Ireland; 4. School of Pharmacy, Medical Biology Centre, Queen's University Belfast, Belfast BT9 7BL, Northern Ireland, United Kingdom.

**Supplementary Information**

**Supplementary Table S1. Trematode Kunitz type inhibitor gene sequences used for phylogenetic analysis.**

**Supplementary Table S2. FhKT proteins present in the excretory/secretory products of NEJ and adult *F. hepatica* represented as Normalized Spectral Abundance Factor (NSAF).**

**Supplementary Figure S1. Schematic representation of the *F. hepatica* Kunitz-type gene structure**

**Supplementary Figure S2. Phylogenetic analysis of helminth Kunitz-type inhibitors.**

**Supplementary Figure S3. Graphical representation of differential gene expression represented as fold change compared to the metacercariae stage.**

**Supplementary Figure S4. Immunolocalization of FhKT1 proteins in the reproductive organs of adult *F. hepatica*.**

**Supplementary Figure S5. Immunolocalization of FhKT1 proteins in the gut of adult *F. hepatica*.**

**Supplementary Figure S6. rFhKT1.1Arg<sup>19</sup>/Ala<sup>19</sup> binding to the active site groove of native cathepsin Ls is not prevented by Z-Phe-Ala-CHN<sub>2</sub>.**

**Supplementary Figure S7. Full length gel photos as shown in (A) Fig. 6; (B) Fig. 9B, D and F; (C) Supplemental Figure 5.**

**Supplementary Table S1:** Trematode Kunitz type inhibitor gene sequences used for phylogenetic analysis

| <b>Nomenclature on Phylogram</b> | <b>Species</b>                 | <b>Gene/Scaffold ID</b> | <b>P1-P4'</b> |
|----------------------------------|--------------------------------|-------------------------|---------------|
| <b>Group A</b>                   |                                |                         |               |
| <i>fgkt1</i>                     | <i>Fasciola gigantica</i>      | Contig12                | LGGIR         |
| <i>fhkt1.2</i>                   | <i>Fasciola hepatica</i>       | BN1106_s318B000274      | LGGIR         |
| <i>fhkt1.1</i>                   | <i>Fasciola hepatica</i>       | BN1106_s8826B000029     | LGGIR         |
| <i>fhkt1.3</i>                   | <i>Fasciola hepatica</i>       | BN1106_s11518B000016    | RGGIR         |
| <i>eckt1</i>                     | <i>Echinostoma caproni</i>     | ECPE_0001647201         | FRGGI         |
| <i>eckt2</i>                     | <i>Echinostoma caproni</i>     | ECPE_0001016301         | LAIHY         |
| <i>eckt3</i>                     | <i>Echinostoma caproni</i>     | ECPE_0001278301         | LAIHY         |
| <i>fgkt2</i>                     | <i>Fasciola gigantica</i>      | Contig38896             | LAIRP         |
| <i>fhkt2</i>                     | <i>Fasciola hepatica</i>       | BN1106_s6608B000014     | LAIRP         |
| <b>Group B</b>                   |                                |                         |               |
| <i>cskt1</i>                     | <i>Clonorchis sinensis</i>     | csin108828              | HENYT         |
| <i>fhkt3</i>                     | <i>Fasciola hepatica</i>       | scaffold5597            | SEHIT         |
| <i>cskt2</i>                     | <i>Clonorchis sinensis</i>     | csin107698              | AENLR         |
| <i>eckt4</i>                     | <i>Echinostoma caproni</i>     | ECPE_0001105001         | RGYHV         |
| <i>eckt5</i>                     | <i>Echinostoma caproni</i>     | ECPE_0000795001         | RAAIT         |
| <i>sjkt1</i>                     | <i>Schistosoma japonicum</i>   | Sjp_0020270             | RASLL         |
| <i>shkt1</i>                     | <i>Schistosoma haematobium</i> | MS3_09801               | RSKLN         |
| <i>smkt3</i>                     | <i>Schistosoma mansoni</i>     | Smp_139840              | RASFN         |
| <b>Group C</b>                   |                                |                         |               |
| <i>sjkt4</i>                     | <i>Schistosoma japonicum</i>   | Sjp_0097640             | RNYNH         |
| <i>sjkt5</i>                     | <i>Schistosoma japonicum</i>   | Sjp_0117580             | GNNST         |
| <i>sjkt6</i>                     | <i>Schistosoma japonicum</i>   | Sjp_0024620             | LKRHP         |
| <i>shkt3</i>                     | <i>Schistosoma haematobium</i> | MS3_09688               | LQNIP         |
| <i>sjkt7</i>                     | <i>Schistosoma japonicum</i>   | Sjp_0024630             | LHNKP         |
| <i>shkt4</i>                     | <i>Schistosoma haematobium</i> | MS3_10748               | LQKKP         |
| <i>smkt2</i>                     | <i>Schistosoma mansoni</i>     | Smp_179120              | LQNKP         |
| <b>Group D</b>                   |                                |                         |               |
| <i>sjkt2</i>                     | <i>Schistosoma japonicum</i>   | Sjp_0030350             | RASIQ         |
| <i>cskt4</i>                     | <i>Clonorchis sinensis</i>     | csin103940              | RGDVT         |
| <i>ovkt2</i>                     | <i>Opisthorchis viverrini</i>  | T265_11148              | FVTAT         |
| <b>Group E</b>                   |                                |                         |               |
| <i>cskt6</i>                     | <i>Clonorchis sinensis</i>     | csin112642              | KAYMP         |
| <i>cskt7</i>                     | <i>Clonorchis sinensis</i>     | csin106214              | LASMP         |
| <i>ovkt1</i>                     | <i>Opisthorchis viverrini</i>  | T265_11147              | RAMIP         |
| <i>cskt3</i>                     | <i>Clonorchis sinensis</i>     | csin102310              | RAMIP         |
| <i>eckt8</i>                     | <i>Echinostoma caproni</i>     | ECPE_0000615701         | FHIFI         |
| <i>fhkt4</i>                     | <i>Fasciola hepatica</i>       | BN1106_s3911B000104     | RGSFP         |
| <i>eckt6</i>                     | <i>Echinostoma caproni</i>     | ECPE_0001134901         | GANIL         |

|                |                                |                     |       |
|----------------|--------------------------------|---------------------|-------|
| <i>fhkt5</i>   | <i>Fasciola hepatica</i>       | BN1106_s4272B000063 | LAHIP |
| <i>fgkt5</i>   | <i>Fasciola gigantica</i>      | Contig26461         | LALVP |
| <i>eckt7</i>   | <i>Echinostoma caproni</i>     | ECPE_0001663401     | HTLLL |
| <b>Group F</b> |                                |                     |       |
| <i>pwkt5</i>   | <i>Paragonimus westermani</i>  | comp19852           | SDSIT |
| <i>pwkt4</i>   | <i>Paragonimus westermani</i>  | comp14876           | GESLT |
| <i>pwkt3</i>   | <i>Paragonimus westermani</i>  | comp20534           | MGHST |
| <i>pwkt1</i>   | <i>Paragonimus westermani</i>  | comp21326           | RALIK |
| <i>pwkt2</i>   | <i>Paragonimus westermani</i>  | comp15715           | RALMK |
| <b>Group G</b> |                                |                     |       |
| <i>smkt1</i>   | <i>Schistosoma mansoni</i>     | Smp_147730          | RALLK |
| <i>shkt2</i>   | <i>Schistosoma haematobium</i> | MS3_09690           | RALIK |
| <i>cskt5</i>   | <i>Clonorchis sinensis</i>     | csin102323          | NFRTR |
| <i>sjkt3</i>   | <i>Schistosoma japonicum</i>   | Sjp_0076670         | RGYFR |
| <i>eckt9</i>   | <i>Echinostoma caproni</i>     | ECPE_0000445201     | SQFIT |

**Supplementary Table S2:** FhKT proteins present in the excretory/secretory products of NEJ and adult *F. hepatica* represented as Normalized Spectral Abundance Factor (NSAF).

| Inhibitor | NEJ 1h** | NEJ 3h** | NEJ 24h** | Adult   | Adult EVs |
|-----------|----------|----------|-----------|---------|-----------|
| FhKT1.1   | -        | -        | 0.00330   | -       | 0.00416   |
| FhKT1.2   | 0.01131  | 0.00482  | 0.00967   | 0.18816 | 0.01258   |
| FhKT1.3   | 0.00447  | 0.00293  | -         | 0.00615 | -         |

\*\*Average NSAF value from triplicate samples

**Supplementary Figure S1. Schematic representation of the *F. hepatica* Kunitz-type gene structure.** Exons are represented by the coloured boxes and the introns are depicted as a black line. The nucleotide sequence encoding the signal peptide (exon 1) and Kunitz domain (exon 2) is represented by the blue exon and red exons, respectively. *fhkt1.3* consists of only one exon, with no sequence encoding a signal peptide. Scale bar indicates the length of 100 nucleotide base pairs. The size of the respective introns in the *F. hepatica* genome assembly (PRJEB6687) is shown.

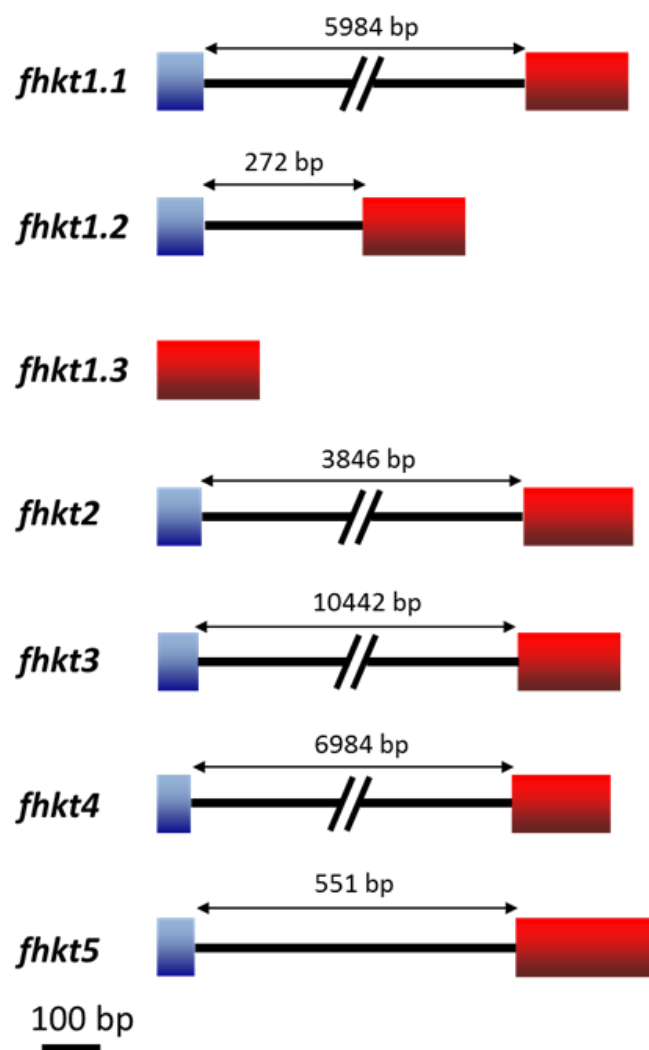

## Supplementary Figure S2. Phylogenetic analysis of helminth Kunitz-type inhibitors.

Maximum-likelihood phylogenetic tree computed using 1000 bootstrap replicates based on the sequence encoding the kunitz domain between cysteine residues 1 and 6 (Cys<sup>1</sup> and Cys<sup>6</sup>), from nine helminth species: *Clonorchis sinensis* (*cskt1-7*), *Echinostoma caproni* (*eckt1-9*), *Fasciola hepatica* (*fhkt1-5*), *F. gigantica* (*fgkt1*, 2 and 5), *Opisthorchis viverrini* (*ovkt1-2*), *Paragonimus westermani* (*pwkt1-5*), *Schistosoma haematobium* (*shkt1-4*), *S. japonicum* (*sjkt1-7*) and *S. mansoni* (*smkt1-3*). Bootstrap values >50% are shown. The green coloured blocks highlight the presence of the *F. hepatica* KT sequences within 3 distinct groups formed by phylogenetic analysis (A, B, and E). The black lines represent the other clusters generated by phylogenetic analysis that do not contain *F. hepatica* sequences (clusters C, D, F and G). The accession numbers of the sequences represented by this phylogenetic tree are included in Supplementary Table S1.

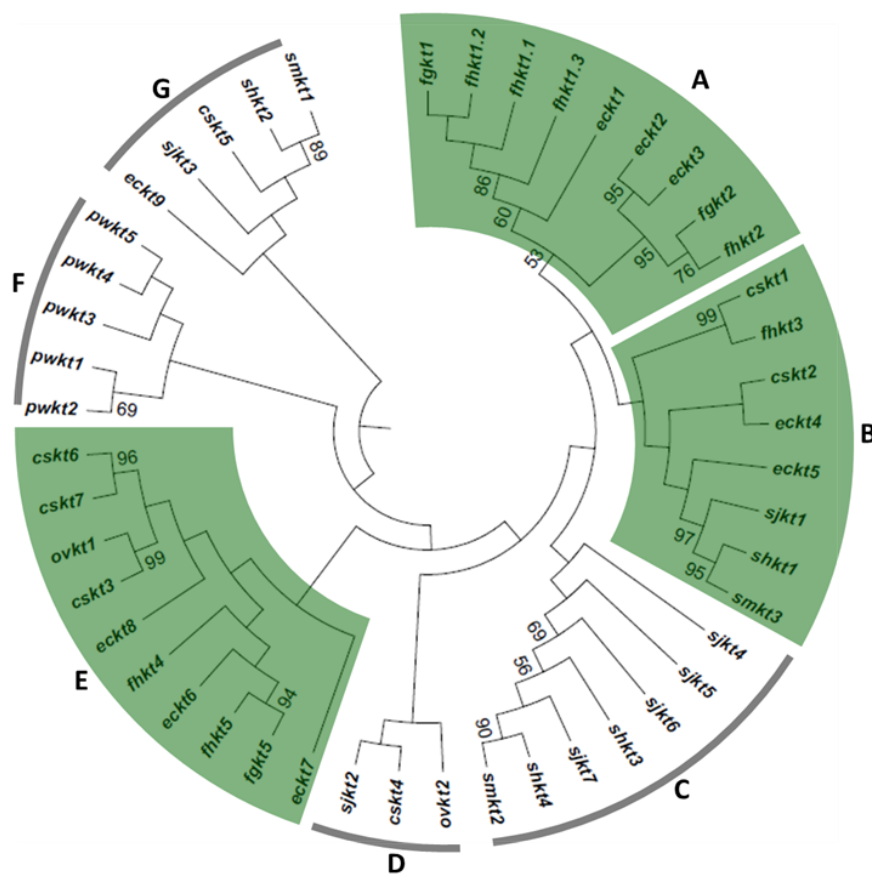

**Supplementary Figure S3. Graphical representation of differential gene expression of the FhKT family represented as log fold change compared to the metacercariae life cycle stage.** Differential expression was calculated as reported by Cwiklinski et al. [3] using negative binomial model of successive developmental stages relative to metacercariae and tagwise dispersion estimated from all samples in edge R. ( $p < 0.01$ : \*\*;  $p < 0.001$ : \*\*\*).

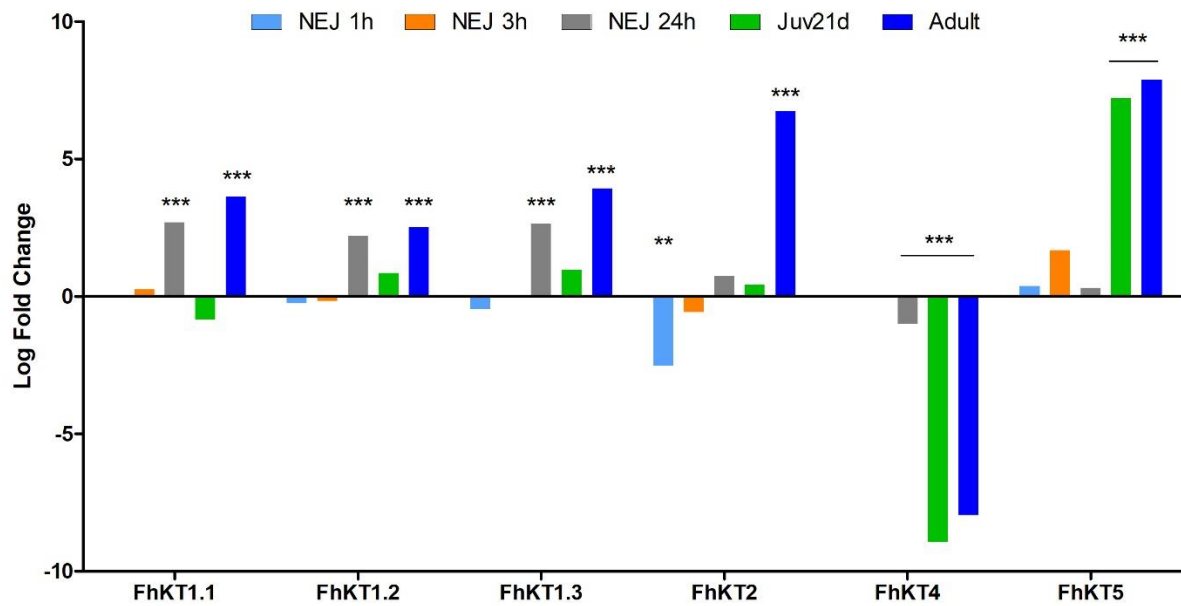

**Supplementary Figure S4. Immunolocalization of FhKT1 proteins in the reproductive organs of adult *F. hepatica*.** Serial sections through a JB-4 embedded adult *F. hepatica* were stained with Toluidine Blue or anti-FhKT1 antibodies. Toluidine Blue staining highlights the vitelline glands (A) and ovaries containing parasite eggs (E) (10x). Sections probed with mouse pre-immune serum (negative control) and stained with anti-mouse FITC show light background fluorescence in the testes (B) and eggshell (F) (10x). Serial sections probed with polyclonal anti-FhKT1 antibodies show strong staining in the vesicular structures within the vitelline cells contained in the vitelline glands (C) (10x), as also shown at higher magnification of 40x (D). Intense staining was also observed in the vitelline cell-derived yolk mass within eggs (G and H, 10X and 100x, respectively). E: egg; G: gut; T: testes; Te: tegument; V: vitelline glands containing vitelline cells. Scale bar: panels A-C and E-G, 200  $\mu$ m; panels D and H, 50  $\mu$ m.

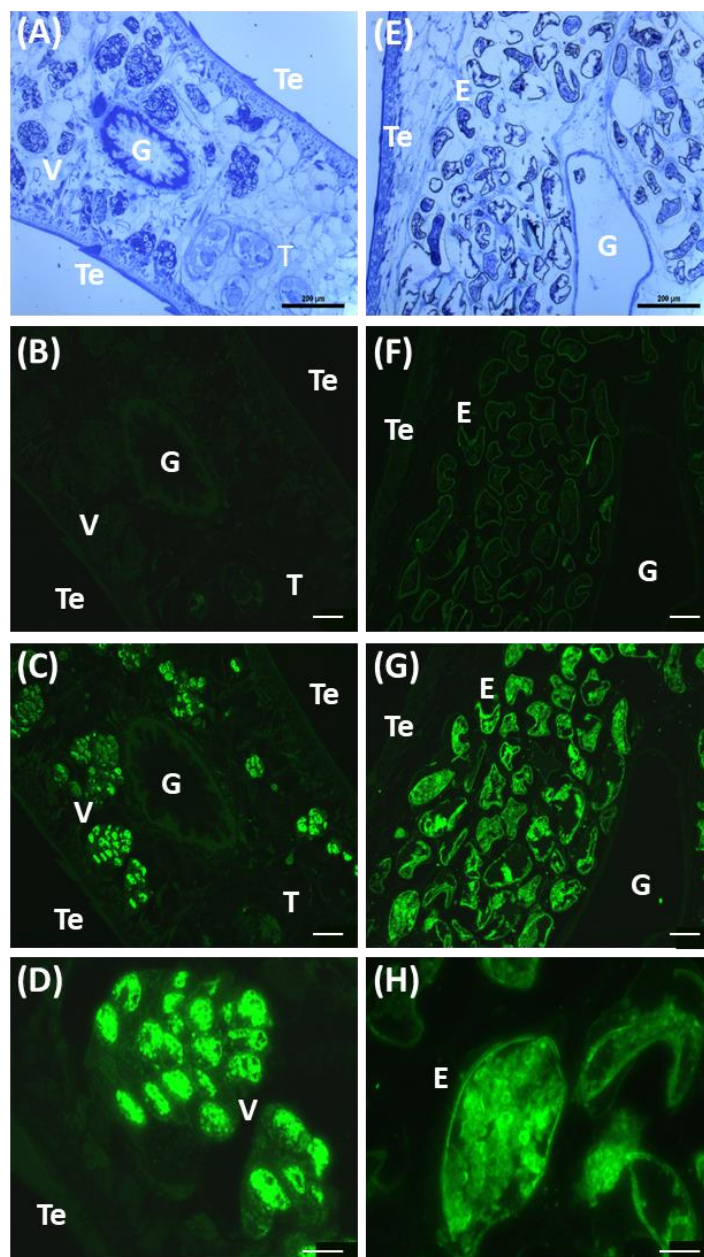



**Supplementary Figure S5. Immunolocalization of FhKT1 proteins in the gut of adult *F. hepatica*.** (A) Cross-section of a JB-4 section of adult *F. hepatica* stained with Toluidine Blue highlighting the digestive gut, parenchyma, tegument and the ventral sucker. (B) Section probed with mouse pre-immune serum (negative control) (C-D) or anti-FhKT1 antibodies followed by with anti-mouse-FITC. Visible staining in the within the ventral sucker and parenchymal cell bodies that are concentrated around near the gut, with diffuse staining throughout the parenchyma and gut (C and D, 10x and 40 x, respectively). G, gut; PC, Parenchymal cell body; Te, tegument; VS, ventral sucker. Scale bar: panels A-C, 200  $\mu$ m; panel D, 50  $\mu$ m.

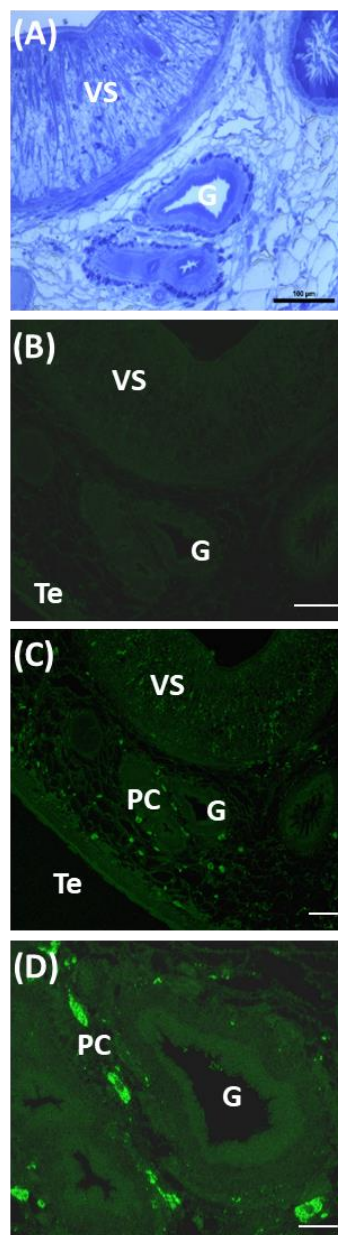

**Supplementary Figure S6. rFhKT1.1Arg<sup>19</sup>/Ala<sup>19</sup> binding to the active site groove of native cathepsin Ls is not prevented by Z-Phe-Ala-CHN<sub>2</sub>** (A) Cysteine protease activity within adult *F. hepatica* excretory/secretory (ES) products measured in the presence of Z-Phe-Ala-CHN<sub>2</sub>, at a concentration ranging from 1 nM to 100 μM (% Activity, relative to the cysteine protease activity of ES containing no inhibitor ± SD). (B) rFhKT1.1Arg<sup>19</sup>/Ala<sup>19</sup> (10 μM) was added to replicate reaction samples and then pull-down using NTA-beads. rFhKT1.1Arg<sup>19</sup>/Ala<sup>19</sup> (black arrow) is not prevented from interacting with the cathepsin L cysteine proteases by Z-Phe-Ala-CHN<sub>2</sub> (white arrows).

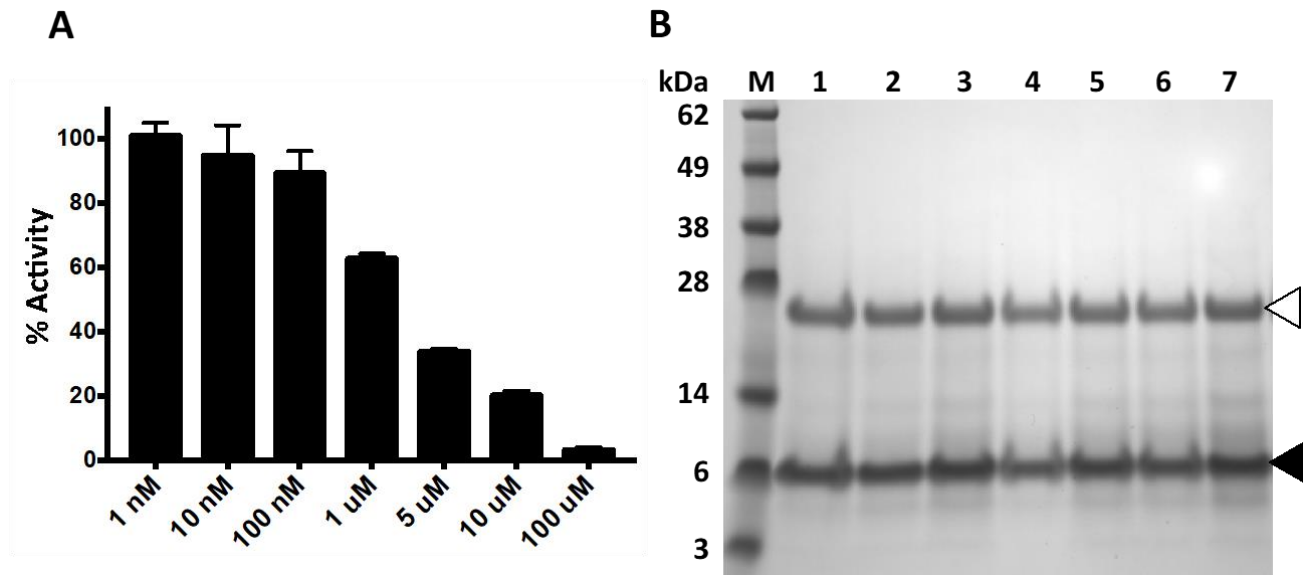

**Supplementary Figure S7. Full length gel photos as shown in (A) Fig. 4A; (B) Fig. 7B, D and F; (C) Supplemental Figure 6B.**

(A) Fig 4A

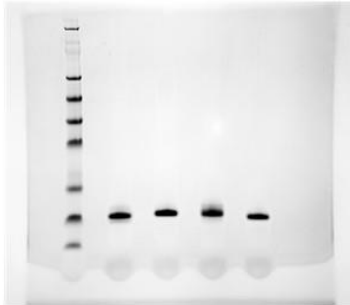

(B) Fig. 7B

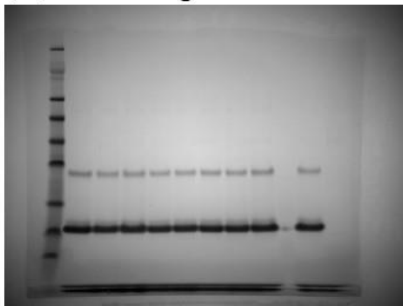

Fig. 7D

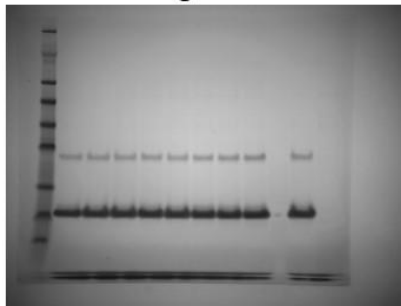

Fig. 7F

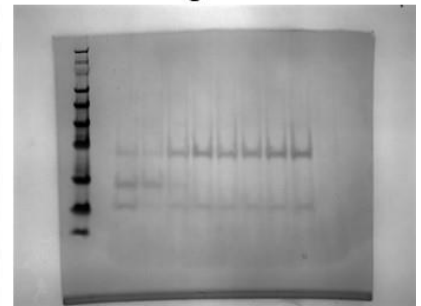

(C) Supplementary Fig. 6B

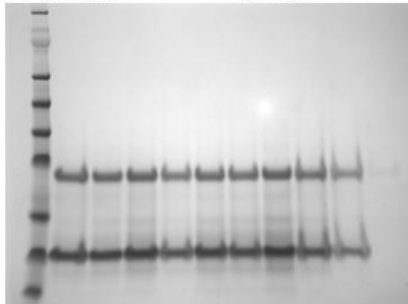

Supplement: 41598_2020_77687_MOESM1_ESM.pdf [file 41598_2020_77687_MOESM1_ESM.pdf]
